# Supplementary material
Source: PubMed Central journal article supplement (PMC5543223)
Supplement: rspb20170876supp1.pdf [file rspb20170876supp1.pdf]

# **Ancient DNA and morphometric analysis reveal extinction and replacement of New Zealand's unique black swans**

Nicolas J. Rawlence<sup>#</sup>, Afroditi Kardamaki<sup>#</sup>, Luke J. Easton, Alan J. D. Tennyson, R. Paul Scofield, Jonathan M. Waters

<sup>#</sup> Equal first authors

## **Supplementary Information**

### **1. Materials and Methods**

#### *(a) Osteology and morphometric analysis*

We recorded 24 length (total length, L) and width (proximal width, PW; shaft width, SW; and distal width, DW) measurements, defined by von den Driesch [1], of postcranial elements including coracoids (cor, L and DW only), humeri (hum), ulnae (ulna), carpometacarpi (cmc, L and PW only), femora (fem), tibiotarsi (tt) and tarsometatarsi (tmt) from associated osteologically mature skeletons or partial skeletons of modern (Australian) *Cygnus atratus*, and prehistoric New Zealand (NZ) and Chatham Islands (CI) black swans (including the holotype of *C. s. chathamicus* Oliver, 1955 NMNZ S.23219; see Table S2). We also recorded 11 cranial measurements, defined by von den Driesch [1], from associated osteologically mature skeletons and isolated crania of modern (Australian) *C. atratus*, and prehistoric NZ and CI black swans (Table S2) – many from the same specimens as for postcranial analysis. There was no measurable cranial material for prehistoric NZ black swans, and as such cranial material of the morphologically and genetically closely related CI black swan lineage (Fig. 1) is used as a proxy for the prehistoric NZ lineage (*cf. Corvus* ravens [2]). Overall, we obtained measurements from 25 partial skeletons, 20 partial postcranial skeletons and 16 crania for modern (Australian) *C. atratus*; six partial postcranial skeletons of the prehistoric NZ black swan; and nine partial skeletons, 11 partial postcranial skeletons and 21 crania for the prehistoric CI black swan.

The cranial measurements are defined as follows:

GBP: Greatest breadth across the processus postfrontales.

GL: Greatest length from the protuberantia occipitalis externa to the apex praemaxillaris.

SBO: Smallest breadth between the orbits on the dorsal side (smallest breadth of the pars nasalis of the frontale).

PSL: Breadth across the processus supraorbitalis of the lacrimal (upper part).

NL: Greatest length of the nasal cavity.

AND: Greatest depth of maxilla at the anterior end of the nasal cavity.

AWNL: Breadth of maxilla across the anterior end of the nasal cavity.

ABL: Greatest breadth across the anterior end of the maxilla.

CFCF: Length from prominentia cerabellus (terminal cranial process) to fissura cranio-facialis.

FCF-AB: Length from fissura cranio-facialis to anterior tip of maxilla.

MD: Greatest depth of mandible.

Measurements were taken using Vernier callipers to the nearest 0.1 mm, using techniques defined by von den Driesch [1]. Specimens were housed in Auckland Museum (AM), National Museum of New Zealand Te Papa Tongarewa (NMNZ), Canterbury Museum (CM), Otago Museum (OM), and the University of Otago Archaeology and Anthropology Department (OUAD). Only non-weathered bones where accurate length measurements could be obtained were analysed to avoid taphonomic biases influencing the results [3].

Morphological differentiation and diagnosibility between modern (Australian) and prehistoric (NZ/CI) genetic lineages (see Fig. 1) were tested utilising the complete, cranial and postcranial datasets in a principal component analysis (PCA) and discriminant function analysis (DFA) framework in R [4]. PCA and DFA analyses utilised the `prcomp` and `lda` functions in R, respectively. Missing values were replaced within each dataset (i.e. not across datasets) and lineage (i.e. modern Australian, prehistoric NZ, prehistoric CI) using predictive matching means in the R package MICE [5] – specimens with too many missing values, as determined by MICE, were excluded from the imputed datasets (Tables S3-5). The MICE algorithm imputes an incomplete column (the target column) by generating ‘plausible’ synthetic values given other columns in the dataset. Each incomplete column must act as a

target column, and has its own specific set of predictors. The default set of predictors for a given target consists of all other columns in the dataset [5-7]. Eigenvalues were examined to determine which axis and variables contributed the most information.

Simpson's log-ratio was utilised to test for differences in mean postcranial element lengths (i.e. 'island rule' effects) amongst modern (Australian) and prehistoric (NZ/CI) lineages [8]. The logarithmic differences of the mean postcranial element lengths (using the iterative imputed datasets) of the CI lineage (proxy for NZ lineage due to small sample size *cf. Corvus* spp. [2]) and combined NZ/CI lineages, relative to the modern (Australian) lineage, were calculated in Excel. These logarithmic differences were subsequently imported into R to construct Fig. 2B.

The flight ability (flightless, flight-reduced or volant) of prehistoric (NZ/CI) swans was assessed following the methodology of Watanabe [9] which statistically compares the flight ability of extinct Anatidae on the basis of known flightless and volant (e.g. modern Australian black swan) taxa. Mean morphometric length measurements were restricted to hum, ulna, cmc, fem and tmt, whereas tt was excluded from the analysis because swan measurements (total length) were not comparable to measurements of [9] (tt length excluding cnemial crest). Morphometric analysis was restricted to modern (Australian) and prehistoric (NZ/CI) swans, and known flightless Anatidae (data sourced from [9]) using PCA in R (as opposed to Linear Discriminant Analysis, as this method produces a binary (flightless, volant) score but gives no indication of flight-reduction; [9]).

Mean body mass of *Cygnus* individuals was reconstructed using tt SW measurements, and the Anatidae body mass reference dataset of Dickison [10]. Tibiotarsus SW (in mm) of prehistoric (NZ/CI) and modern (Australian) associated *Cygnus* skeletons was converted into tt circumference using the formula  $C = 2\pi r$  in Excel using the iterative imputed complete and postcranial datasets. We included anatid tt circumference/body mass reference data from Dickison [10] (see Table 3.1 of [10]), covering the phylogenetic and size range of extant anatids, to model the mean predicted weight of each *Cygnus* lineage. Modelling was conducted in R using a modified version of Dickison [10] Table 3.2 formula for Least Squares regression of body mass (y, in grams) on anatid bone measurements. Dickinson [10] formula is  $y = a \times x^b$ . We modified this formula ( $y = a + x^b$ ) to regress body weight against tt circumference, with 'a' (intercept = 330 g), 'x' (circumference) and 'b' (exponential scaling factor = 2.526). The use of this modified formula and tt circumference (as opposed to femoral

circumference) was to obtain predicted mean weights of modern (Australian) *Cygnus* in the range of 5-6 kg (matching that known for recently dead birds; [11]) as swans are a highly derived form of anatid compared to ducks and geese. Our revised formula predicted the weight of the extinct South Island goose (*Cnemiornis calcitrans*) within the range predicted by Dickison [10], therefore we are confident of the reliability of our formula.

## 2. Results:

### (a) PCA/DFA of complete *Cygnus* skeletons

Principal Component Analysis (PCA) analysis of complete (cranial and postcranial) skeletons of modern (Australian) and prehistoric (CI – proxy for NZ in the absence of measurable cranial material) *Cygnus* showed pronounced morphometric divergence (Fig. S2), and 100% diagnosability (Fig. S3). High positive PC1 loadings were seen for all cranial and postcranial elements (length and width measurements) indicating prehistoric (NZ/CI) *Cygnus* are overall larger than modern (Australian) black swans. Negative PC2 loadings (Hum DW - 0.35, Ulna PW -0.33) indicate modern (Australian) *Cygnus* are more gracile than prehistoric (NZ/CI) black swans. Positive PC2 loadings on cranial elements (NL 0.27, FCF-AB 0.26) indicate that prehistoric (NZ/CI) *Cygnus* have more elongate skulls compared to modern (Australian) black swans.

### (b) PCA/DFA of *Cygnus* crania

In contrast to PCA and DFA analyses of complete (cranial and postcranial) *Cygnus* skeletons, the PCA distributions of modern (Australian) and prehistoric (CI – proxy for NZ due to the absence of measurable cranial material) are fully overlapping (Fig. S4). However, the positive PC1 outlier is morphologically confirmed as a modern (Australian) *C. atratus* and therefore represents the extreme upper end of the size range for this species. If this morphometric outlier is ignored, there is minimal overlap between modern (Australian) and prehistoric (NZ/CI) black swans. Positive PCA loadings on all cranial elements (lengths and widths) indicate that prehistoric (NZ/CI) *Cygnus* had larger and more robust crania than the more gracile modern (Australian) black swans. In spite of the morphometric overlap shown in Fig. S4, there was 100% diagnosability of modern (Australian) and prehistoric (NZ/CI) individuals (Fig. S5).

(c) *PCA/DFA of Cygnus postcranial skeletons*

Principal Component Analysis showed clear morphometric divergence (with minimal overlap) of modern (Australian) and prehistoric (NZ/CI) black swans (Fig. 2A). Negative PC1 loadings on all postcranial elements (lengths and widths) indicates that modern (Australian) *Cygnus* are on average smaller than prehistoric (NZ/CI) black swans. Positive (Hum SW 0.46, Fem SW 0.34) and negative (Hum L -0.37; Ulna PW -0.35) PC2 loadings indicate that prehistoric (NZ/CI) black swans have more robust (larger and wider) wings and legs compared to modern (Australian) *Cygnus*. We also detected pronounced morphological substructure amongst prehistoric NZ and CI black swans, with relatively more robust humeri and femora detected in prehistoric mainland NZ *Cygnus* (Fig. 2A).

Discriminant Function Analysis showed high diagnosability between modern (Australian) and prehistoric (NZ/CI) *Cygnus* (Fig. S6): 98% for modern (Australian), 100% for prehistoric CI, and 67% for prehistoric NZ – this equates to only one modern (Australian) individual (CM Av7322) mis-diagnosed as a prehistoric NZ *Cygnus*, and two prehistoric NZ individuals (NMNZ S.5504, CM Av12571) mis-diagnosed as prehistoric CI *Cygnus*. Despite the absence of cranial material for these specimens, a previous study on morphometrics of NZ birds [12] showed that similar misdiagnoses in DFA analyses of cranial or postcranial skeletons are not seen when complete skeletons are analysed in a DFA framework, especially in species where there is overlapping size distributions between taxa.

(d) *Simpson's log ratio of Cygnus postcranial skeletons*

Simpson's log ratio of postcranial elements indicated that size differences between modern (Australian) and prehistoric (NZ/CI) detected in the PCA analysis (Fig. 2A), were particularly pronounced for hind limb elements (i.e. femora, tibiotarsi and tarsometatarsi). Bones from prehistoric CI (proxy for prehistoric NZ due to the small sample size [six postcranial skeletons] from mainland NZ *cf. Corvus* spp.; [2]) were highly elongated relative to those from modern (Australian) black swans (Fig. 2B). This contrast is highlighted by distinct tarsometatarsus to femur ratios (Fig. 2B).

The inclusion of prehistoric NZ black swan postcranial elements in the CI dataset did result in a decrease in the Simpson's log ratio of humeri, ulna and carpometacarpi (*cf.* to coracoid) (Fig. S7). The decrease in log ratio for these postcranial elements is no doubt due to the small sample size of prehistoric NZ black swans available for analysis. However, log ratios for the combined prehistoric (NZ/CI) black swans were still larger than modern

(Australian) *Cygnus*, indicating that overall prehistoric NZ/CI black swans are larger than modern (Australian) individuals, with pronounced elongation of the leg bones.

*(e) Flight ability of prehistoric (NZ/CI) Cygnus*

Assessment of flight ability (flightless, flight-reduced, or volant) using PCA suggest that prehistoric (NZ/CI) swans were likely flight-reduced compared to volant modern (Australian) black swans. Specifically, principal component loadings indicated significant elongation of the hind limbs (PC1: fem 0.42; tmt 0.45) and proportionally shorter wing bones in relation to hind limbs in prehistoric (NZ/CI) swans (PC2: hum -0.26; ulna -0.37; cmc -0.41; fem 0.65 and tmt 0.44). These findings are congruent with morphometric analyses (Fig. 2) showing that the wing bones of prehistoric (NZ/CI) individuals were more robust than modern (Australian) black swans.

*(f) Reconstructing body mass of prehistoric (NZ/CI) Cygnus*

Reconstructing body mass (mean weight in kg) from femoral shaft width (Fig. S9 *cf.* tibiotarsus shaft width, Fig. 2C), did not produce mean weights of modern (Australian) *C. atratus* in the range of 5-6 kg, as have been reported for recently dead birds [8]. Swans have asymmetrical long bone shafts that are relatively narrow, therefore the simple SW measurement may not predict shaft circumference well and hence our modification of the scaling formula. Body mass reconstructions using tibiotarsus shaft width show prehistoric (NZ/CI) *Cygnus* to be 20-32% heavier than those from modern (Australian) populations (Fig. 2C), with weights ranging from 6-10 kg, compared to 4-9 kg for modern (Australian) individuals: mean weights were 5.75 kg (4.11-8.93 kg) for modern (Australian) *C. atratus*, 6.93 kg (6.37-7.67 kg) for prehistoric NZ *Cygnus*, and 8.40 kg (7.11-9.71 kg) for prehistoric CI *Cygnus* (See Table S6).

### **3. Discussion**

*(a) Species concepts and taxonomic implications*

The combined genetic, morphometric and palaeoecological data support recognition of the modern (Australian) and prehistoric (NZ and CI) black swans as separate species under the diagnosable species concept (DSC) [13-16]. Furthermore, genetic and morphometric data support recognition of the prehistoric NZ and CI lineages as separate subspecies under the DSC. This view of species is a derivative of the phylogenetic species concept [17], designed

to avoid taxonomic over-inflation [13, 18] and rejects Helbig's et al. [14] allospecies, semispecies and superspecies concepts (see Gill et al. [19] for discussion). Though not universally accepted [20-22] our use of the DSC is the approach advocated by Birds NZ (Ornithological Society of New Zealand Checklist Committee; [19]). We cannot apply the Biological Species Concept (BSC) [23-24] as the modern (Australian) and prehistoric (NZ and CI) lineages are allopatric, with the latter lineage extinct. The BSC is highly problematic in birds with widespread interspecific and intergeneric hybridisation and paraphyly in good biological species [25-27]. It would be possible to further test the presence of two species within black swans in future research, through high-throughput sequencing utilising single-stranded library preparation and hybridisation capture-enrichment techniques specifically designed for ancient DNA [28-29]. Although species delimitation based on single-marker gene trees (*sensu* [30]) should be treated with caution [31], the 335 bp of mtDNA *CR* utilised in this study (containing 25 parsimony informative sites) does show that multiple lineages are present within black swans that are diagnosably distinct based on morphology and palaeobehaviour. Alternative taxonomic hypotheses are not supported by our data. The combined genetic, morphometric and palaeoecological data rejects the hypothesis of a single black swan species across Australasia. Likewise, the genetic substructure within the prehistoric NZ lineage (one fixed SNP between NZ and CI swans), despite pronounced morphological substructure (more robust humeri and femora in prehistoric mainland NZ black swans) does not support the hypothesis of three species of black swan.

## References

1. von den Driesch A. 1976 *A guide to the measurements of animal bones from archaeological sites*. Peabody Museum Bulletin 1.
2. Scofield RP, Mitchell KJ, Wood JR, de Pietri VL, Jarvie S, Llamas B, Cooper A. 2017 The origin and phylogenetic relationships of the New Zealand ravens. *Mol. Phylo. Evol.* **106**, 136–143.
3. Worthy TH. 1998 A remarkable fossil and archaeological avifauna from Marfell's Beach, Lake Grassmere, South Island, New Zealand. *Rec. Cant. Mus.* **12**, 79–176.
4. R Development Core Team. 2008 *R: A Language and Environment for Statistical Computing*. Vienna: R Foundation for Statistical Computing.

5. van Buuren S, Groothuis-Oudshoorn G. 2011 MICE: Multivariate imputation by chained equations in R. *J. Stat. Soft.* **45**, 29864.
6. Schenker N, Taylor JMG. 1996 Partially parametric techniques for multiple imputation. *Comp. Stat. Data Anal.* **22**, 425-446.
7. Clavel J, Merceron G, Escarguel G. 2014 Missing data estimation in morphometrics: how much is too much? *Syst. Biol.* **63**, 203-218.
8. Wood JR, Mitchell KJ, Scofield RP, de Pietri VL, Rawlence NJ, Cooper A. 2017 Phylogenetic relationships and terrestrial adaptations of the extinct laughing owl, *Sceloglaux albifacies* (Aves: Strigidae). *Zoo. J. Linn. Soc.* **179**, 907-918.
9. Watanabe J. 2017 Quantitative discrimination of flightlessness in fossil Anatidae from skeletal proportions. *Auk Ornith. Advan.* **134**, 672-695.
10. Dickison MR. 2007 *The allometry of giant flightless birds*. Unpublished PhD thesis, Duke University.
11. Marchant S, Higgins PJ. 1990 *Handbook of Australian, New Zealand and Antarctic birds*, volume 1, part B pelican to ducks. Melbourne: Oxford University Press.
12. Rawlence NJ, Scofield RP, Spencer HG, Lallas C, Easton KJ, Tennyson AJD, Adams M, Pasquet E, Fraser C, Waters JM, Kennedy M. 2016 Genetic and morphological evidence for two species of *Leucocarbo* shag (Aves, Pelecaniformes, Phalacrocoracidae) from southern South Island of New Zealand. *Zoo. J. Linn. Soc.* **177**, 676–694.
13. Baum DA, Donoghue MJ. 1995 Choosing among alternative “phylogenetic” species concepts. *Syst. Bot.* **20**, 560–573.
14. Helbig AJ, Knox AG, Parkin DT, Sangster G, Collinson M. 2002 Guidelines for assigning species rank. *Ibis* **144**, 518–525.
15. Patten MA, Unitt P. 2002 Diagnosability versus mean differences of sage sparrow subspecies. *Auk* **119**, 26–35.
16. Cicero C, Johnson NK. 2006 Diagnosability of subspecies: lessons from sage sparrows (*Amphispiza belli*) for analysis of geographic variation in birds. *Auk* **123**, 266–274.
17. Cracraft J. 1983 Species concepts and speciation analysis. *Curr. Ornith.* **1**, 159–187.



18. Issac NJB, Mallet J, Mace GM. 2004 Taxonomic inflation: its influence on macroecology and conservation. *Trends Ecol. Evol.* **19**, 464–469.
19. Gill BJ, Bell BD, Chambers GK, Medway DG, Palma RL, Scofield RP, Tennyson AJD, Worthy TH. 2010 *Checklist of the Birds in New Zealand, Norfolk and Macquarie Islands, and the Ross Dependency Antarctica*, 4th edn. Wellington: Te Papa Press in association with the Ornithological Society of New Zealand.
20. Tobias JA, Seddon N, Spottiswoode CN, Pilgrim JD, Fishpool LDC, Collar NJ. 2010 Quantitative criteria for species delimitation. *Ibis* **152**, 724–726.
21. Gill FB. 2014 Species taxonomy of birds: which null hypothesis? *Auk* **131**, 150–161.
22. Toews DPL. 2014 Biological species and taxonomic species: will a new null hypothesis help? (A comment on Gill 2014). *Auk* **132**, 78–81.
23. Mayr E. 1940 Speciation phenomena in birds. *Amer. Nat.* **74**, 249–278.
24. Mayr E. 1996 What is a species and what is not? *Phil. Sci.* **63**, 261–276.
25. Grant PR, Grant BR. 1992 Hybridization of bird species. *Science* **256**, 193–197.
26. Grant PR, Grant BR. 1997 Genetics and the origin of bird species. *PNAS* **94**, 7768–7775.
27. Joseph L, Omland KE. 2009 Phylogeography: its development and impact in Australo-Papuan ornithology with special reference to paraphyly in Australian birds. *Emu* **109**, 1–23.
28. Gansauge MT, Meyer M. 2013 Single-stranded DNA library preparation for the sequencing of ancient or damaged DNA. *Nat. Proto.* **8**, 737–748.
29. Mitchell KJ, Wood JR, Scofield RP, Llamas B, Cooper A. 2014 Ancient mitochondrial genome reveals unsuspected taxonomic affinity of the extinct Chatham duck (*Pachyanas chathamica*) and resolves divergence times for New Zealand and sub-Antarctic brown teals. *Mol. Phylo. Evol.* **70**, 420–428.
30. Edwards SV. 2009 Is a new and general theory of molecular systematics emerging? *Evolution* **63**, 1–19.
31. Carstens BC, Pelletier TA, Reid NM, Satler JD. 2013 How to fail at species delimitation. *Mol. Ecol.* **22**, 4369–4383.

**Table S1** Ancient, historic and modern *Cygnus* specimens used for genetic analysis. Abbreviations are as follows: NMNZ, Museum of New Zealand Te Papa Tongarewa; CM, Canterbury Museum; JH, Jill Hamel Collection; AM, Auckland Museum; OZD, Otago University Zoology Department; OM, Otago Museum; WAM, Western Australian Museum; SAM, South Australian Museum; MV, Museum Victoria; ANWC, Australian National Wildlife Collection, CSIRO, Canberra; QM, Queensland Museum; NZ, New Zealand; WA, Western Australia; NT, Northern Territory; SA, South Australia; TAS, Tasmania; VIC, Victoria; NSW, New South Wales; ACT, Australian Capital Territory; QLD, Queensland.

| Species (based on DNA and morphology) | Museum accession no. | Geographic location          | Age                    | GenBank No. |
|---------------------------------------|----------------------|------------------------------|------------------------|-------------|
| <i>C. s. sumnerensis</i>              | NMNZ S.40879         | Manurewa Pt.                 | <2000 yrs BP – 1450 AD | MF455394    |
| <i>C. s. sumnerensis</i>              | CM Av16010           | Wairau Bar                   | 1280-1450 AD           | MF455451    |
| <i>C. s. sumnerensis</i>              | CM Av25624           | Wairau Bar                   | 1280-1450 AD           | MF455452    |
| <i>C. s. sumnerensis</i>              | CM Av16000           | Wairau Bar                   | 1280-1450 AD           | MF455450    |
| <i>C. s. sumnerensis</i>              | CM Av12865           | Marfells Beach               | <1500 yrs BP-1450 AD   | MF455379    |
| <i>C. s. sumnerensis</i>              | CM Av12423           | Marfells Beach               | <1500 yrs BP-1450 AD   | MF455447    |
| <i>C. s. sumnerensis</i>              | CM Av11901           | Marfells Beach               | <1500 yrs BP-1450 AD   | MF455448    |
| <i>C. s. sumnerensis</i>              | CM Av10601a          | Lake Grassmere               | <1500 yrs BP-1450 AD   | MF455446    |
| <i>C. s. sumnerensis</i>              | CM Av9650            | Lake Grassmere               | <1500 yrs BP-1450 AD   | MF455380    |
| <i>C. s. sumnerensis</i>              | CM Av16260           | Redcliffs                    | 1280-1450 AD           | MF455449    |
| <i>C. s. sumnerensis</i>              | JH HW105             | Harwood                      | <2000 yrs BP-1450 AD   | MF455384    |
| <i>C. s. sumnerensis</i>              | JH HW23 (Grey)       | Harwood                      | <2000 yrs BP-1450 AD   | MF455385    |
| <i>C. s. sumnerensis</i>              | JH HW23 (Brown)      | Harwood                      | <2000 yrs BP-1450 AD   | MF455386    |
| <i>C. s. sumnerensis</i>              | CM Av34804           | Pounawea                     | 1280-1450 AD           | MF455381    |
| <i>C. s. sumnerensis</i>              | CM Av34794           | Pounawea                     | 1280-1450 AD           | MF455382    |
| <i>C. s. sumnerensis</i>              | CM Av32919           | Pounawea                     | 1280-1450 AD           | MF455383    |
| <i>C. s. sumnerensis</i>              | NMNZ S.32994         | Chatham Islands              | Late Holocene          | MF455435    |
| <i>C. s. chathamicus</i>              | NMNZ S.26438         | Tahatika Stream, Chatham Is. | Late Holocene          | MF455387    |
| <i>C. s. chathamicus</i>              | NMNZ S.25083         | Tahatika Creek, Chatham Is.  | Late Holocene          | MF455388    |
| <i>C. s. chathamicus</i>              | CM Av5288            | Chatham Is.                  | Late Holocene          | MF455437    |
| <i>C. s. chathamicus</i>              | CM Av5289            | Chatham Is.                  | Late Holocene          | MF455438    |
| <i>C. s. chathamicus</i>              | CM Av3314            | Chatham Is.                  | Late Holocene          | MF455439    |
| <i>C. s. chathamicus</i>              | CM Av5391            | Chatham Is.                  | Late Holocene          | MF455440    |
| <i>C. s. chathamicus</i>              | CM Av6493.2          | Chatham Is.                  | Late Holocene          | MF455441    |
| <i>C. s. chathamicus</i>              | CM Av5307.10         | Chatham Is.                  | Late Holocene          | MF455442    |
| <i>C. s. chathamicus</i>              | CM Av6493.3          | Chatham Is.                  | Late Holocene          | MF455443    |
| <i>C. s. chathamicus</i>              | NMNZ S.36074         | Waitangi West, Chatham Is.   | Late Holocene          | MF455389    |
| <i>C. s. chathamicus</i>              | NMNZ S.29964         | Tupuangi Creek, Pitt Is.     | 1450-1650 AD           | MF455390    |
| <i>C. s. chathamicus</i>              | NMNZ S.29761         | Tupuangi Creek, Pitt Is.     | 1450-1650 AD           | MF455391    |
| <i>C. s. chathamicus</i>              | NMNZ S.31490         | Tupuangi Creek, Pitt Is.     | 1450-1650 AD           | MF455392    |

|                          |                |                                  |                |          |
|--------------------------|----------------|----------------------------------|----------------|----------|
| <i>C. s. chathamicus</i> | NMNZ S.35332   | North Head, Pitt Is.             | Late Holocene  | MF455393 |
| <i>C. s. chathamicus</i> | CM Av6493.1    | Chatham Islands                  | Late Holocene  | MF455398 |
| <i>C. s. chathamicus</i> | NMNZ S.23219   | Chatham Islands                  | Late Holocene  | MF455431 |
| <i>C. s. chathamicus</i> | NMNZ S.26457   | Tahatika Creek, Chatham Is.      | Late Holocene  | MF455432 |
| <i>C. s. chathamicus</i> | NMNZ S.28867   | Tahatika Creek, Chatham Is.      | Late Holocene  | MF455433 |
| <i>C. s. chathamicus</i> | NMNZ S.33001   | Tahatika Creek, Chatham Is.      | Late Holocene  | MF455434 |
| <i>C. s. chathamicus</i> | NMNZ S.26979   | Tahatika Creek, Chatham Is.      | Late Holocene  | MF455436 |
| <i>C. atratus</i>        | AM LB216       | Waikaremoana Cave, NZ            | 1450 AD-1800's | MF455445 |
| <i>C. atratus</i>        | NMNZ S.46032   | Waikaremoana Cave, NZ            | 1450 AD-1800's | MF455444 |
| <i>C. atratus</i>        | NMNZ OR.16629  | Awatapu Lagoon, NZ               | 1972           | MF455395 |
| <i>C. atratus</i>        | NMNZ OR.16641  | Lake Rotorua, NZ                 | 1971           | MF455396 |
| <i>C. atratus</i>        | OZD AA63       | Wairarapa, NZ                    | Modern         | MF455419 |
| <i>C. atratus</i>        | NMNZ OR.29671  | Pauatahanui Stream, NZ           | Modern         | MF455420 |
| <i>C. atratus</i>        | OZD AA60       | All Day Bay, NZ                  | Modern         | MF455416 |
| <i>C. atratus</i>        | OZD AA61       | All Day Bay, NZ                  | Modern         | MF455417 |
| <i>C. atratus</i>        | OZD AA62       | All Day Bay, NZ                  | Modern         | MF455418 |
| <i>C. atratus</i>        | OM AV909       | Hawksbury Lagoon, NZ             | Modern         | MF455430 |
| <i>C. atratus</i>        | NMNZ OR.29960  | Blind Jims Creek, Chatham Is.    | Modern         | MF455397 |
| <i>C. atratus</i>        | CM Av30460     | Chatham Is.                      | Modern         | MF455453 |
| <i>C. atratus</i>        | OZD CI1        | Chatham Is.                      | Modern         | MF455454 |
| <i>C. atratus</i>        | OZD CI2        | Chatham Is.                      | Modern         | MF455455 |
| <i>C. atratus</i>        | OZD CI3        | Chatham Is.                      | Modern         | MF455456 |
| <i>C. atratus</i>        | OZD CI4        | Chatham Is.                      | Modern         | MF455457 |
| <i>C. atratus</i>        | OZD CI5        | Chatham Is.                      | Modern         | MF455458 |
| <i>C. atratus</i>        | OZD CI6        | Chatham Is.                      | Modern         | MF455459 |
| <i>C. atratus</i>        | OZD CI7        | Chatham Is.                      | Modern         | MF455460 |
| <i>C. atratus</i>        | OZD CI8        | Chatham Is.                      | Modern         | MF455461 |
| <i>C. atratus</i>        | OZD CI9        | Chatham Is.                      | Modern         | MF455462 |
| <i>C. atratus</i>        | SAM ABTC2814   | Adelaide, SA                     | Modern         | MF455399 |
| <i>C. atratus</i>        | SAM ABTC2857   | Southeast SA                     | Modern         | MF455400 |
| <i>C. atratus</i>        | SAM ABTC127893 | SA                               | Modern         | MF455401 |
| <i>C. atratus</i>        | SAM ABTC81555  | VIC                              | Modern         | MF455402 |
| <i>C. atratus</i>        | SAM ABTC67801  | Eyre Penn., SA                   | Modern         | MF455403 |
| <i>C. atratus</i>        | SAM ABTC28716  | NT                               | Modern         | MF455404 |
| <i>C. atratus</i>        | QM A002725     | Warner, Brisbane, QLD            | Modern         | MF455405 |
| <i>C. atratus</i>        | QM A002811     | Brendale, Brisbane, QLD          | Modern         | MF455406 |
| <i>C. atratus</i>        | ANWC B50124    | Mullawoolka Basin, NSW           | Modern         | MF455407 |
| <i>C. atratus</i>        | ANWC B50086    | Gulpa Creek, NSW                 | Modern         | MF455408 |
| <i>C. atratus</i>        | ANWC B45489    | Bells Lagoon, TAS                | Modern         | MF455409 |
| <i>C. atratus</i>        | ANWC B45490    | Bells Lagoon, TAS                | Modern         | MF455410 |
| <i>C. atratus</i>        | ANWC B50182    | Mullawoolka Basin, NSW           | Modern         | MF455411 |
| <i>C. atratus</i>        | ANWC B53612    | Lake Burley Griffin, ACT         | Modern         | MF455412 |
| <i>C. atratus</i>        | ANWC B50277    | Big Poorrarecup Lake, WA         | Modern         | MF455413 |
| <i>C. atratus</i>        | ANWC B50245    | Esperance, WA                    | Modern         | MF455414 |
| <i>C. atratus</i>        | ANWC B50405    | Lake Namming, WA                 | Modern         | MF455415 |
| <i>C. atratus</i>        | MV 7291        | Albert Park Lake, Melbourne, VIC | Modern         | MF455421 |
| <i>C. atratus</i>        | MV 7292        | Edithvale Wetlands, VIC          | Modern         | MF455422 |
| <i>C. atratus</i>        | MV 11230       | Patterson Lakes, VIC             | Modern         | MF455423 |

|                   |            |                         |        |          |
|-------------------|------------|-------------------------|--------|----------|
| <i>C. atratus</i> | MV 2075    | Orbost, VIC             | Modern | MF455424 |
| <i>C. atratus</i> | WAM TA373  | Lake Monger Wembley, WA | Modern | MF455425 |
| <i>C. atratus</i> | WAM TA374  | Lake Monger Wembley, WA | Modern | MF455426 |
| <i>C. atratus</i> | WAM TA376  | Lake Monger Wembley, WA | Modern | MF455427 |
| <i>C. atratus</i> | WAM TA385  | Lake Joondalup, WA      | Modern | MF455428 |
| <i>C. atratus</i> | WAM PR3500 | Lake Monger, WA         | Modern | MF455429 |

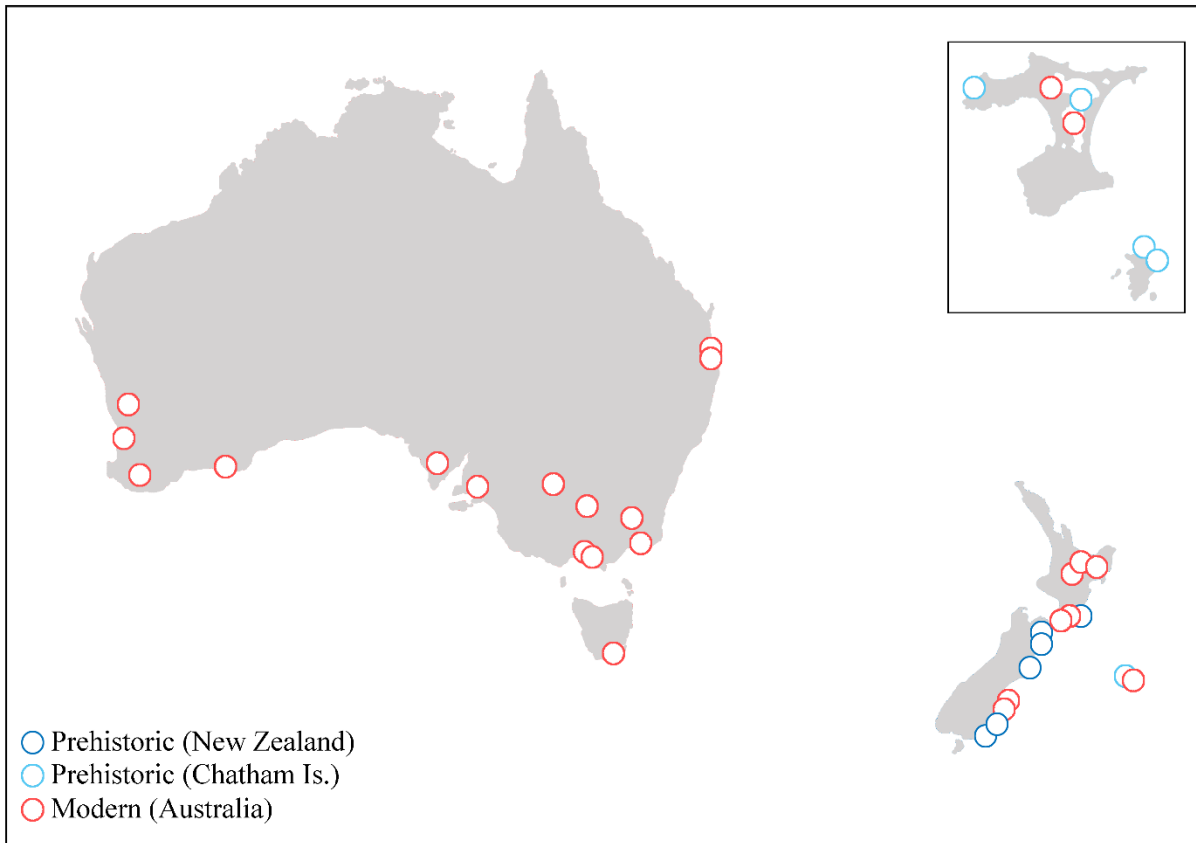

**Figure S1** Geographic and temporal distribution of *Cygnus* samples analysed in this study. Insert: Chatham Islands. Modern (Australian) black swans with sampling locations of Northern Territory, South Australia, southeast South Australia and Victoria are not shown in Figure 1.

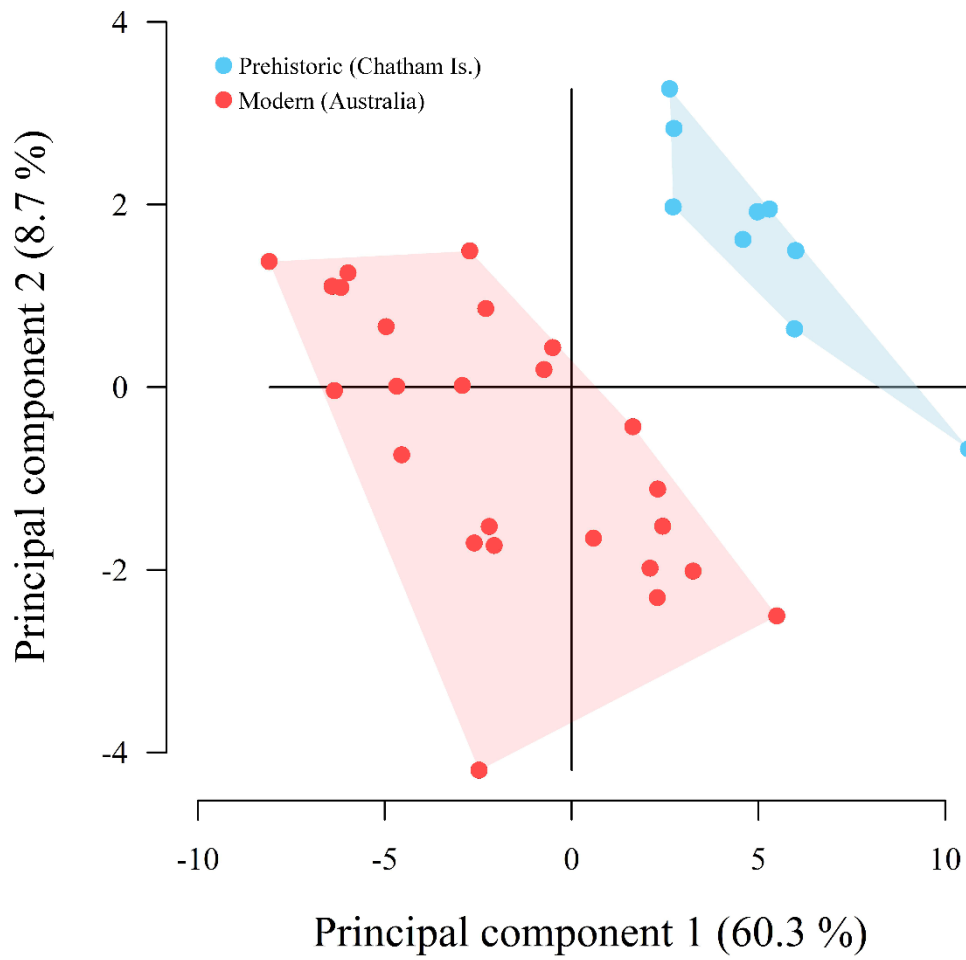

**Figure S2** Principal Component Analysis of pooled cranial and postcranial measurements of modern (Australian) and prehistoric (CI – proxy for NZ) *Cygnus* swans.

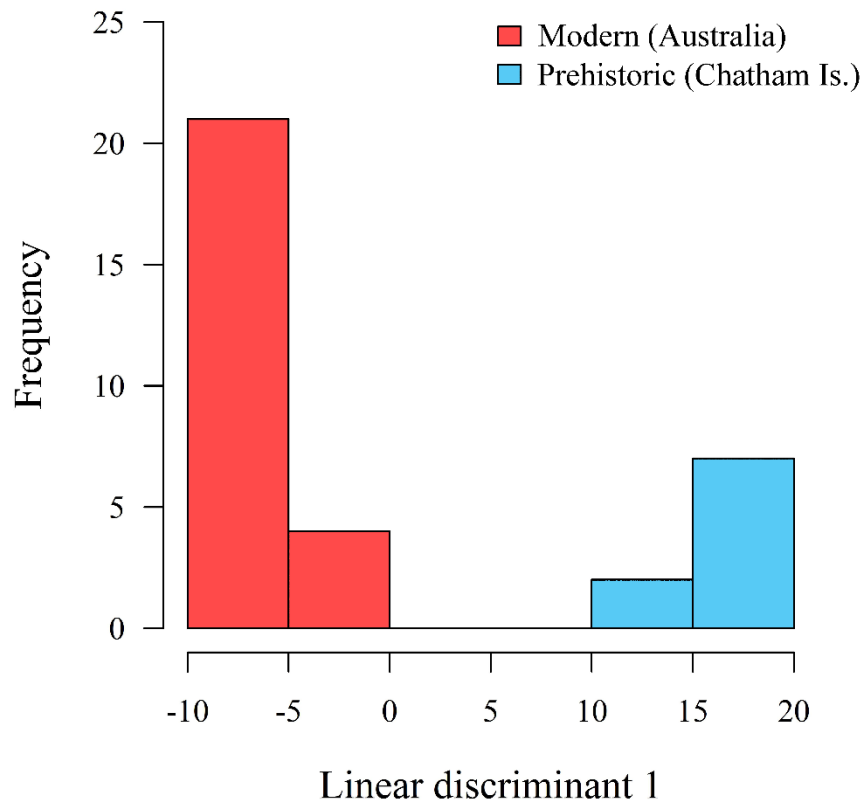

**Figure S3** Discriminant Function Analysis of pooled cranial and postcranial measurements of modern (Australian) and prehistoric (CI – proxy for NZ) *Cygnus* swans.

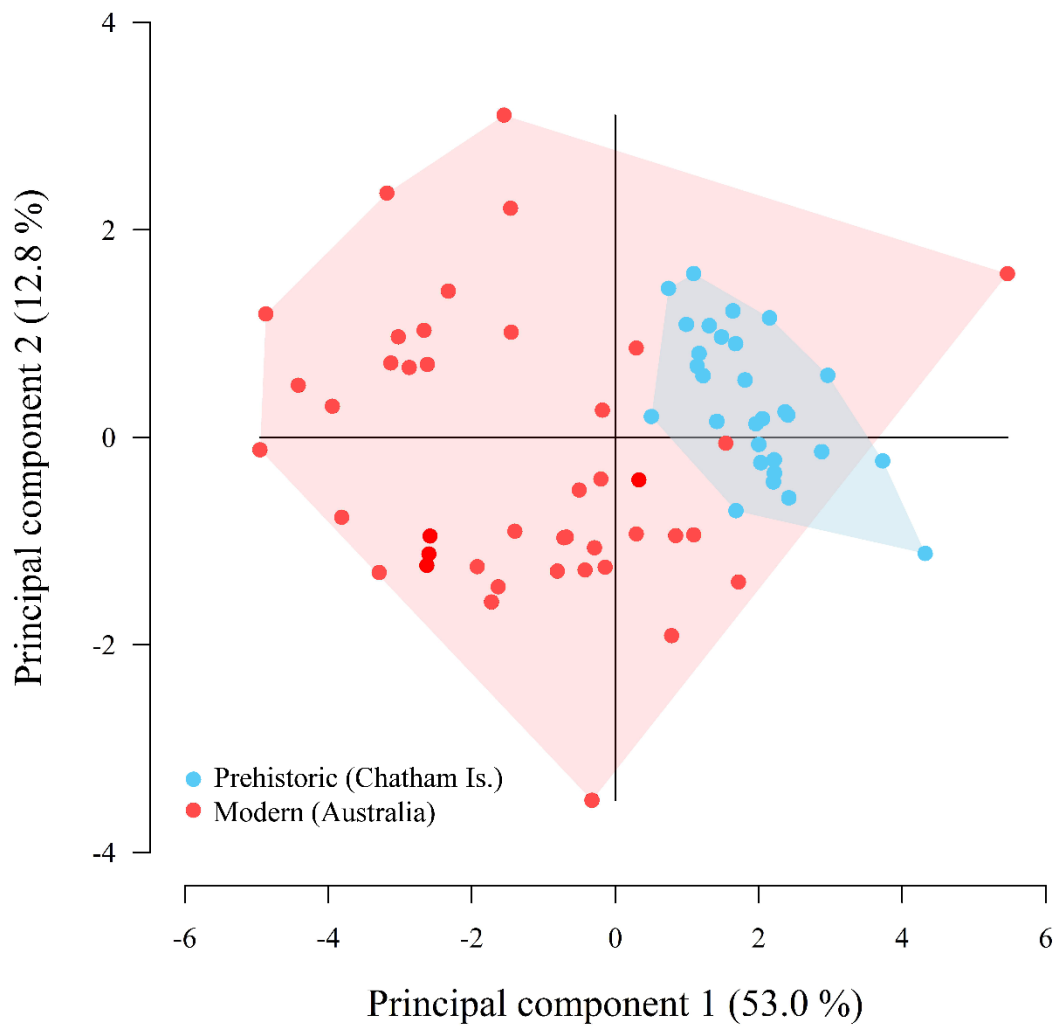

**Figure S4** Principal Component Analysis of cranial measurements of modern (Australian) and prehistoric (CI – proxy for NZ) *Cygnus* swans.



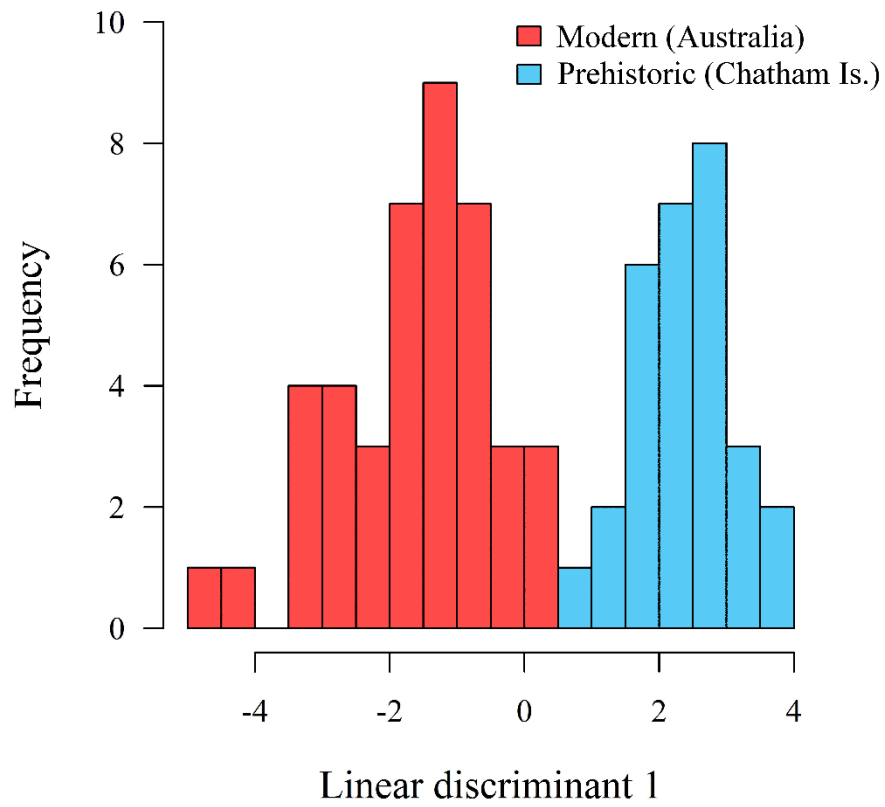

**Figure S5** Discriminant Function Analysis of cranial measurements of modern (Australian) and prehistoric (CI – proxy for NZ) *Cygnus* swans.

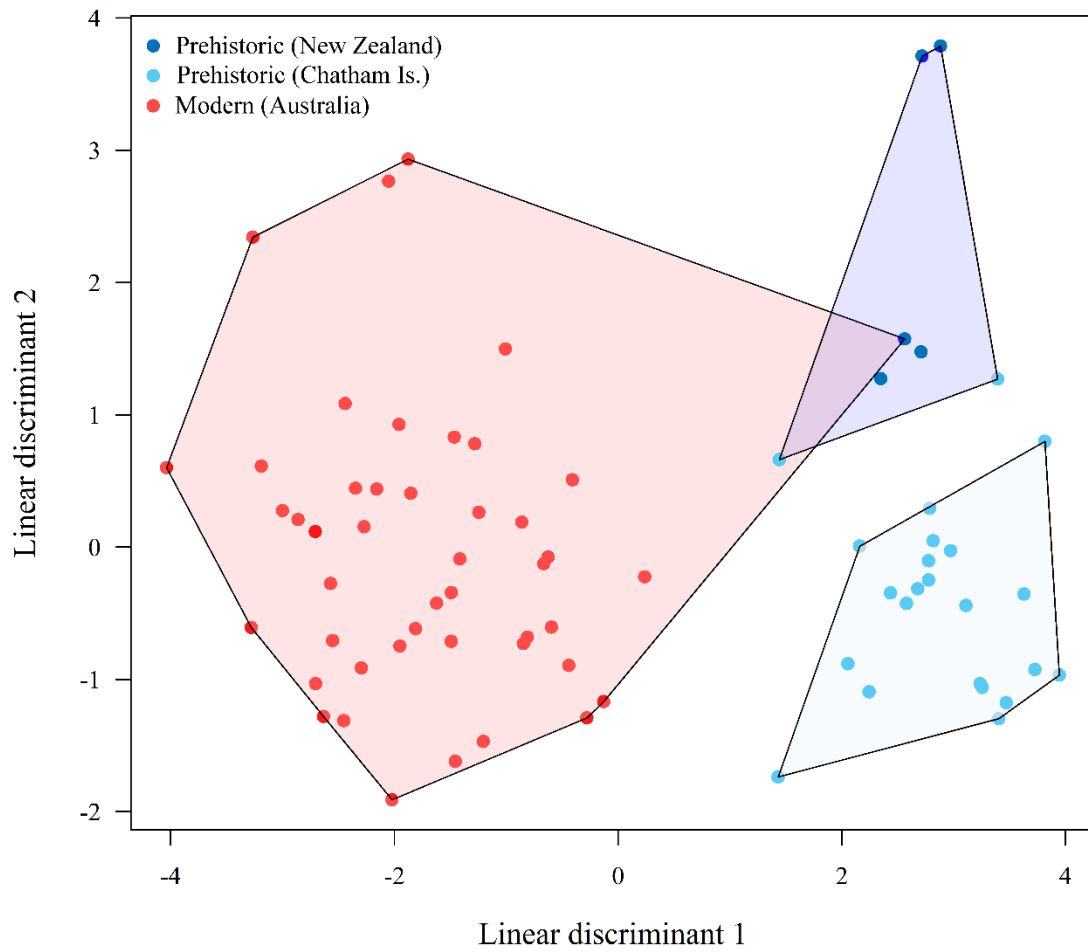

**Figure S6** Discriminant Function Analysis of postcranial skeletons of modern (Australian) and prehistoric (NZ/CI) *Cygnus* swans. The convex hulls represent the morphometric distribution of each genetic lineage, while the colours of the dots represent the morphometric diagnosis as determined by DFA.

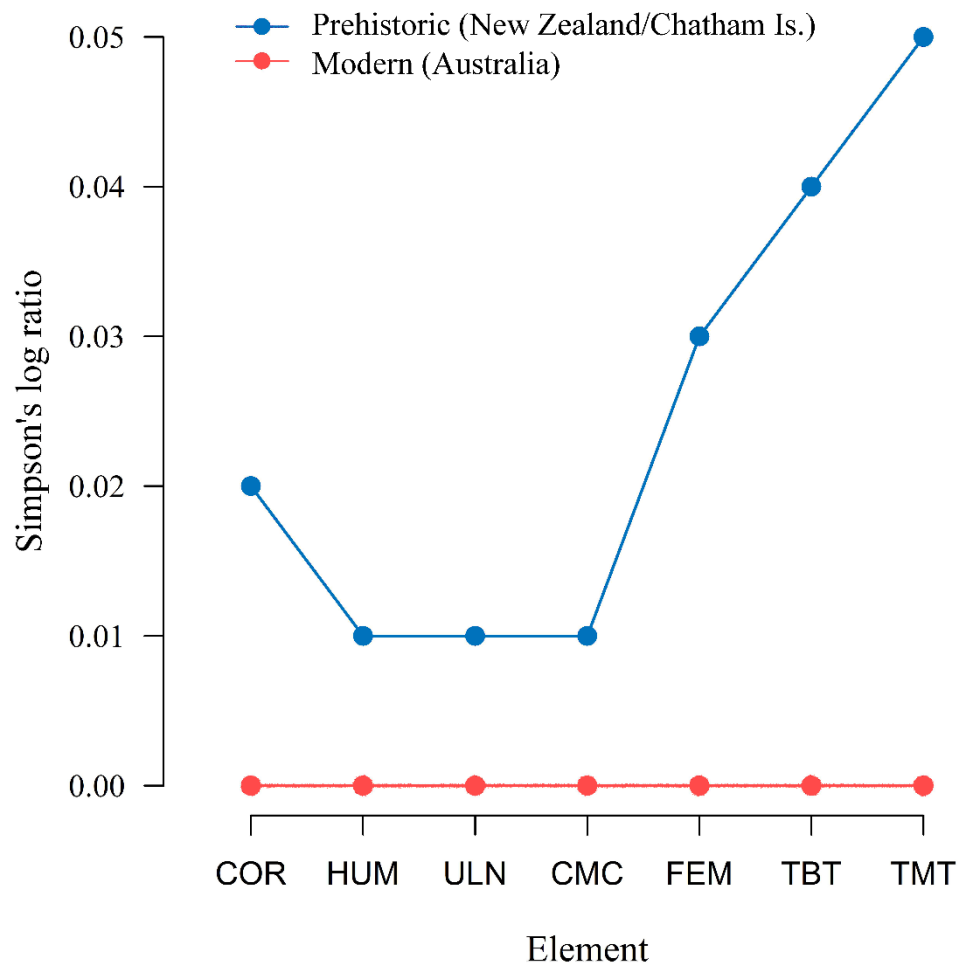

**Figure S7** Simpson's log-ratio diagram, showing the logarithmic differences of mean lengths of the postcranial elements of prehistoric *Cygnus* from New Zealand and the Chatham Islands relative to the modern (Australian) *Cygnus*. Abbreviations: COR, coracoid; HUM, humerus; ULN, ulna; CMC, carpometacarpus; FEM, femur, TBT, tibiotarsus; TMT, tarsometatarsus.

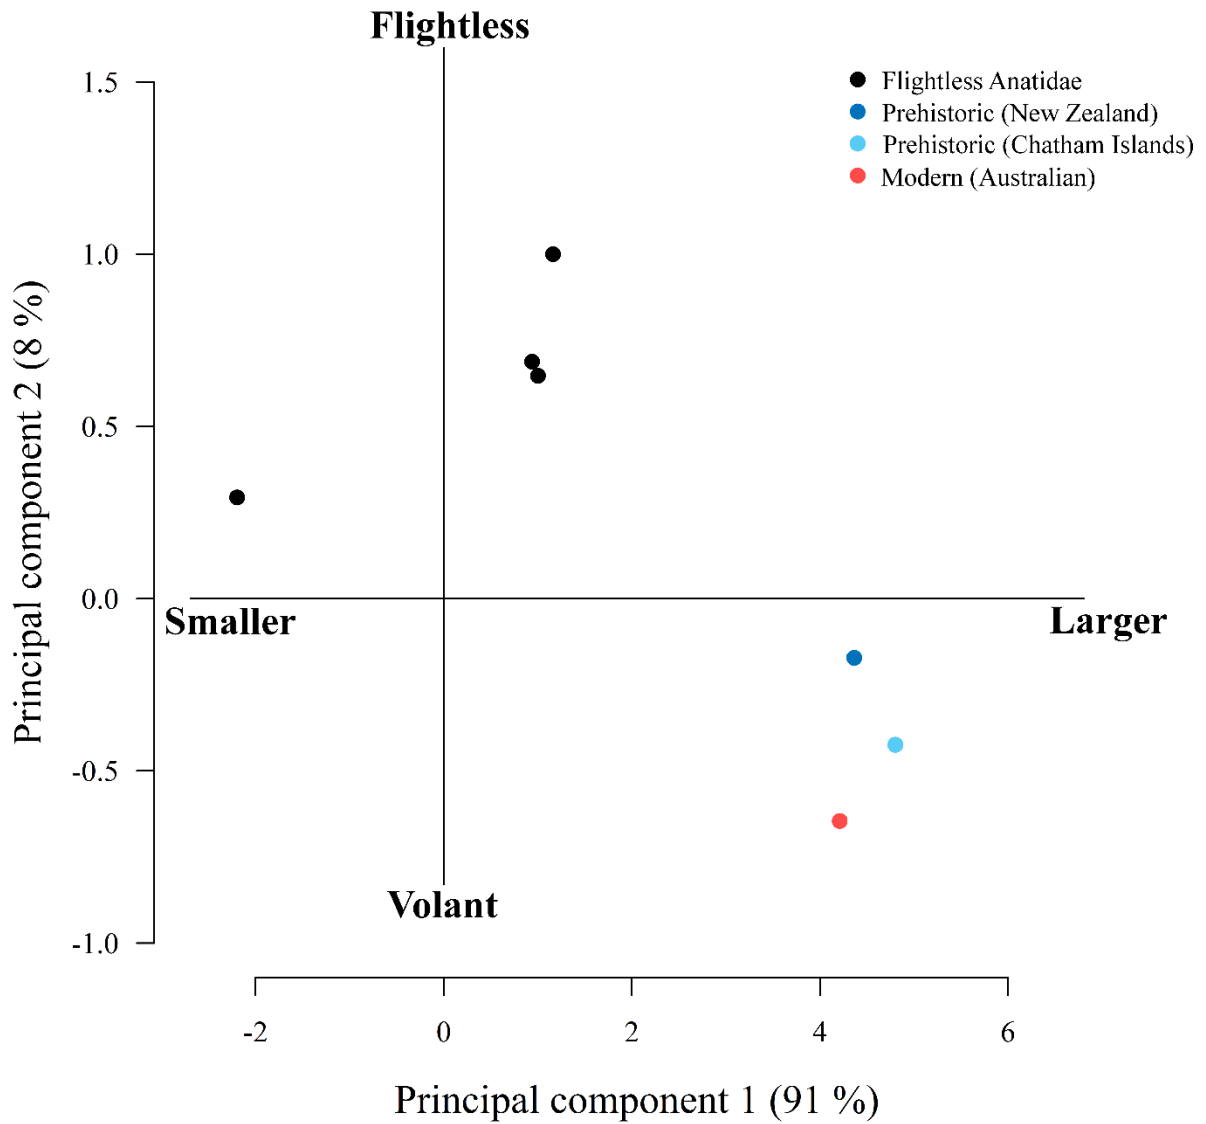

**Figure S8** Principal Component Analysis of postcranial mean element length measurements (hum, ulna, cmc, fem and tmt) of modern (Australian) volant black swans, known flightless Anatidae (data sourced from Watanabe [9]), and prehistoric (NZ/CI) *Cygnus* swans of unknown flight ability.

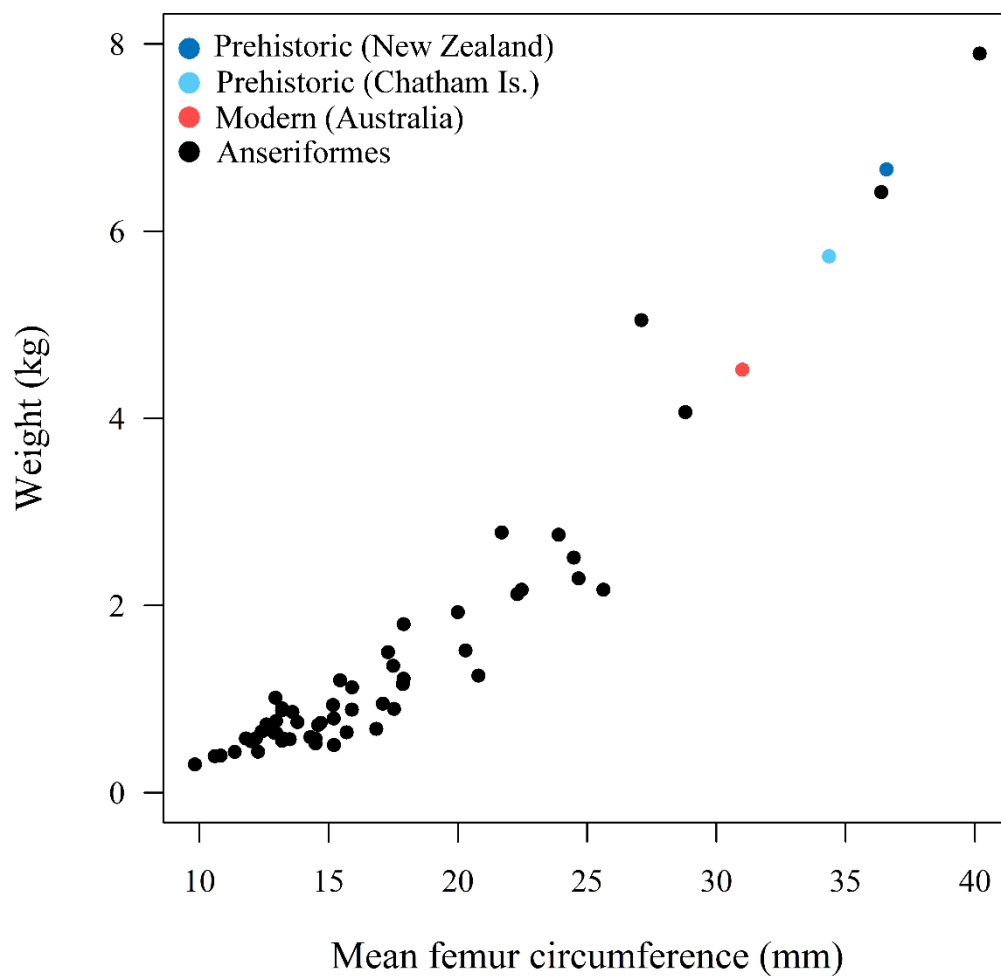

**Figure S9** Relationship between mean body mass (in kg) and femora circumference of anseriforms. Data are from Dickison [10].
